# Cell movements, neuronal organisation and gene expression in hindbrains lacking morphological boundaries

Ronald Nittenberg<sup>1,2,\*</sup>, Ketan Patel<sup>1,3</sup>, Yogish Joshi<sup>1</sup>, Robb Krumlauf<sup>3</sup>, David G. Wilkinson<sup>3</sup>, Paul M. Brickell<sup>2,†</sup>, Cheryll Tickle<sup>1</sup> and Jonathan D. W. Clarke<sup>1,‡</sup>

<sup>1</sup>Department of Anatomy and Developmental Biology, University College London, Medawar Building, Gower Street, London WC1E 6BT, UK

<sup>2</sup>Department of Molecular Pathology, University College London, Windeyer Building, Cleveland Street, London W1P 6DB, UK

<sup>3</sup>Division of Developmental Neurobiology, National Institute of Medical Research, Mill Hill, London NW7 1AA, UK

\*Present address: Linklaters & Paines, Barrington House, 59-67 Gresham Street, London EC2V 7JA, UK

†Present address: Molecular Haematology Unit, 30 Guilford Street, Institute of Child Health, London WC1N 1EH, UK

‡Author for correspondence (e-mail: jonathan.clarke@ucl.ac.uk)

## SUMMARY

Rhombomeres are segmental units of the hindbrain that are separated from each other by a specialised zone of boundary cells. Retinoic acid application to a recently segmented hindbrain leads to disappearance of posterior rhombomere boundaries. Boundary loss is preceded by changes in segmental expression of *Krox-20* and *Cek-8* and followed by alterations in *Hox* gene expression. The characteristic morphology of boundary cells, their expression of *follistatin* and the periodic accumulation of axons normally associated with boundaries are all lost. In the absence of boundaries, we detect no change in anteroposterior

dispersal of precursor cells and, in most cases, no substantial cell mixing between former rhombomeric units. This is consistent with the idea that lineage restriction can be maintained by processes other than a mechanical barrier composed of boundary cells. Much of the early organisation of the motor nuclei appears normal despite the loss of boundaries and altered *Hox* expression.

Key words: rhombomeres, segmentation, retinoic acid, chick, *Hox* genes, *Cek-8*, *Krox-20*

## INTRODUCTION

Segmentation is a mechanism for spatial organisation along the body axis. The vertebrate hindbrain, for example, is subdivided into segmental units called rhombomeres. Cells from each rhombomere are destined to form a precise part of the hindbrain and this is achieved by the almost complete absence of cell mixing between neighbouring compartments (Fraser et al., 1990; Birgbauer and Fraser, 1994). Although each rhombomere will initially generate a similar set of basic neuronal types (Lumsden and Keynes, 1989; Clarke and Lumsden, 1993), they subsequently differentiate along diverse pathways. For example, in the chick, generation of specific branchiomotor nerves, sensory ganglia and fate of neural crest cells are strictly correlated with their rhombomeric origin (Lumsden and Keynes, 1989; Lumsden et al., 1991). Segmentation is characterised by the appearance of a narrow zone of specialized boundary cells that lie at the interface between neighbouring rhombomeres (Lumsden and Keynes, 1989; Heyman et al., 1993, 1995).

Morphological segmentation in the hindbrain is preceded by the expression of two stripes of both the transcription factor *Krox-20* (Wilkinson et al., 1989a) and the receptor tyrosine kinase *Cek-8* (Nieto et al., 1992; Irving et al., 1996; *Cek-8* is the chick orthologue of mouse *Sek-1*) in the prospective terri-

tories of r3 and r5. *Cek-8* may be involved in the process of segmentation (Xu et al., 1995) and early phases of *Krox-20* expression are required for some aspects of *Hox* gene expression in these segments (Sham et al., 1993; Nonchev et al., 1996). The expression of a combinatorial code of *Hox* genes, whose anterior expression limits are coincident with rhombomere boundaries (Wilkinson et al., 1989b; Graham et al., 1989; Duboule and Dolle, 1989), is thought to confer identity to individual rhombomeres. Grafting rhombomeres to more anterior locations suggests that *Hox* expression is fixed and fate determined just prior to segmentation (Guthrie et al., 1992; Kuratani and Eichele, 1993; Simon et al., 1995), but recent work shows *Hox* expression can be altered when rhombomeres are grafted to more posterior locations suggesting that *Hox* expression is not irreversible at these stages (Itasaki et al., 1996).

The generation and maintenance of lineage restrictions at rhombomere borders are thought to be of fundamental importance in the process of segmentation and subsequent regional specification within the hindbrain. The mechanisms that restrict cell mixing at rhombomere borders, however, are not well understood but there are at least two possibilities that could act alone or together. One is that the immiscibility of compartments may be established by alternating surface properties of cells from prospective odd- and even-numbered

segments. Grafting experiments demonstrate that cell mixing is higher when tissue from two even or two odd rhombomeres are juxtaposed rather than when even tissue is placed next to odd (Guthrie et al., 1993). The second mechanism is that the boundary cells generated at the interface of odd- and even-numbered segments may act as mechanical barriers that prevent mixing (Lumsden, 1990). Boundary cells may form a relatively immobile population as they display reduced levels of interkinetic nuclear migration (Guthrie et al., 1991) and increased levels of a highly adhesive form of NCAM (Lumsden and Keynes, 1989). One approach to understanding the role of boundary cells would be to examine cell movements in hindbrains that have no boundaries. Although there are several mouse mutations in which hindbrain segmentation is disrupted (e.g. McKay et al., 1994; Mark et al., 1993) and exogenous retinoic acid can suppress or alter segmentation in the anterior hindbrain of several species (Papalopulu et al., 1991; Marshall et al., 1992; Wood et al., 1994; Hill et al., 1995), cell movements in these hindbrains has not yet been studied.

Here we report that local application of retinoic acid to chick embryonic hindbrains, just after the initial events of morphological segmentation, leads to loss of boundary cells in the posterior hindbrain. We have analysed *Hox*, *Krox-20* and *Cek-8* expression in the boundaryless hindbrain and examined cell movement and neuronal organisation. The results are consistent with the idea that lineage restriction can be maintained by processes other than a mechanical barrier composed of boundary cells. *Hox* gene expression in the posterior hindbrain is altered but the early spatial organisation of several hindbrain motor nuclei is not affected.

## MATERIALS AND METHODS

### Retinoic acid application

Eggs were purchased from Poyndon Farm, Hertfordshire, England, incubated at 38°C and staged according to Hamburger and Hamilton (1951). All-*trans*-retinoic acid (Sigma, UK) was dissolved in dimethylsulphoxide (DMSO) and loaded on AG1-X2 beads of approximately 100 µm diameter as described by Tickle et al. (1985). Control beads were soaked in DMSO only. Beads were placed into the fourth ventricle of the hindbrains through a small slit in the roof plate of stage 10-11 chick embryos. Eggs were resealed, returned to the incubator and harvested at different time points. Embryos were fixed in 4% paraformaldehyde in phosphate-buffered saline.

### Whole-mount in situ hybridisation

Preparation of digoxigenin-labelled RNA probes and the protocol for whole-mount in situ hybridisation were as described by Nieto et al. (1996). A 420 bp antisense RNA probe corresponding to nucleotides 394-813 was used to detect *Cek-8* transcripts (Sajjadi and Pasquale, 1993). *Follistatin* transcripts were detected using antisense RNA for the whole cDNA (1.1 kb, Conolly et al., 1995). The *Hoxb-4* antisense riboprobe (1.3 kb) is complementary to the homeobox and sequences 5' and 3' to it (Burke et al., 1995). The riboprobe to detect *Krox-20* transcripts spanned 0.23 kb of the *Krox-20* cDNA. The *Hoxa-2* probe was generated as described in Prince and Lumsden (1994) and *Hoxb-1* expression was screened using an antisense riboprobe stretching over 2 kb.

### 3A10 antibody staining

Whole-mount staining followed the protocol of Lumsden and Keynes (1989).

### Iontophoretic application of DiI and DiA

Small deposits of the lipophilic membrane dye DiI (Molecular Probes D-282) were applied in ovo to the developing hindbrain by iontophoresis. Microelectrodes with a tip diameter of approximately 2 µm were filled at their tips with a small quantity of DiI (3 mg/ml in dimethyl formamide) and then backfilled with 1 M lithium chloride. These were connected to the positive pole of a 9 volt battery. The electrode was micromanipulated into position and the dye driven out of the electrode by completing the circuit with a second silver wire electrode placed in the egg albumen and attached to the battery's negative terminal. Completing the circuit for about 2-3 seconds was sufficient to label a small patch of cells. The success and position of the labelled cells was checked on an epifluorescence microscope fitted with a extra long working distance ×20 objective, and imaged and measured using a cooled CCD camera and Biovision software. For double-label experiments, the membrane dye DiA (Molecular Probes D-3883) was applied in the same way. The embryos were allowed to develop for 48 hours and flat-mounted hindbrains examined using a Nikon fluorescence microscope or Leica confocal microscope.

### Retrograde labelling

Trigeminal, facial and glossopharyngeal nerve roots of control and experimental embryos fixed in 4% paraformaldehyde at stages 18-20 were exposed by dissection. The roots were injected with 3 mg/ml DiI or DiA in dimethylformamide and left overnight in fixative at room temperature. Hindbrains were dissected free of mesenchyme, prepared as flat mounts and examined on a Nikon fluorescence microscope.

## RESULTS

### Retinoic acid leads to loss of hindbrain boundaries

We implanted AG1X2 beads (100 µm diameter) soaked in 10 µg/ml retinoic acid into the 4th ventricle at the level of r4 in stage 10-11 chick embryos. Beads of 200 µm diameter release retinoic acid continuously over at least 20 hours but this period is probably reduced for beads with half the diameter as used here (Eichele et al., 1984). Embryos were allowed to develop for 24 or 48 hours, up to stages 15/16 or 19/20, respectively, and their hindbrains dissected and flat mounted. Phase-contrast optics revealed that this local retinoic acid application caused loss of boundaries between posterior rhombomeres. In 60% of cases, only rhombomeres 1 to 3 (r1 to r3) were distinguishable and boundaries posterior to r3 were missing (Fig. 1A,B). In 26% of cases, one or two rhombomeres were visible and boundaries posterior to r1 or r2 missing. In the remaining cases (14%), either 4 or 5 rhombomeres were visible. The identity of rhombomeres was deduced from their relationship with the cranial nerve roots.

Morphological loss of posterior boundaries was associated with the absence of *follistatin* transcripts, which mark rhombomere boundaries in normal embryos at stages 18-20 (Conolly et al., 1995). Normally five stripes of *follistatin* expression co-localise with morphological boundaries from the r2/3 boundary down to the r6/7 boundary, whereas a maximum of two stripes could be seen in retinoic-acid-treated embryos ( $n=4/4$ , Fig. 1C,D). Parasagittal sections of the hindbrain revealed that the characteristic fan-shaped array of boundary cells and the increased extracellular spaces normally associated with boundaries (Heyman et al., 1993, 1995) were also lost (Fig. 1E,F).

In normal embryos, staining with the monoclonal antibody



3A10 revealed that neuronal differentiation in r2 and r4 is advanced ahead of r3 and r5, and that boundaries contain more circumferential axons than non-boundary regions (Fig. 1G, and Lumsden and Keynes, 1989). In retinoic-acid-treated hindbrains, at stage 15 (i.e. 24 hours after treatment), there was virtually no sign of the usual alternating levels of neuronal differentiation (Fig. 1H) and the periodic axon accumulations normally associated with boundaries was lost at these and subsequent stages (Fig. 1I).

### Changes in *Cek-8* and *Krox-20* expression precede morphological changes

*Cek-8* and *Krox-20* are first expressed in a region that will become r3 at stages 8<sup>-</sup> and 8, respectively (Irving et al., 1995) and in both r3 and r5 from stage 10 onwards (Fig. 2A,B). *Cek-8* expression lasts until at least stage 22 (Fig. 2C) whereas *Krox-20* is only present until stage 18. Retinoic acid beads placed anterior to r1 or posterior to r6 did not affect *Cek-8* expression ( $n=3$ ). At 4 to 6 hours after placing a retinoic acid bead at any position between r1 and r6, *Cek-8* expression in r3 was unaffected but abolished in r5 in all treated embryos ( $n=10/10$ , Fig. 2D). Complete loss of *Cek-8* expression in r5 was observed 4 hours after treatment ( $n=2/2$ ). At this time, all boundaries were still visible. *Cek-8* remained absent from r5 but present in r3 throughout the following 48 hours (to stage 20,  $n=9/9$ , Fig. 2E). In stage 20 embryos with three or more rhombomeres, the presence of morphological boundaries was correlated with sharp expression boundaries of *Cek-8* in r3 ( $n=9/9$ , Fig. 2E). In specimens where only two rhombomeres were clearly distinguishable, *Cek-8* had a sharp expression boundary at the anterior part of r3, where a morphological boundary was still visible, but not at the posterior part, where *Cek-8* expression was downregulated and the morphological boundary abolished ( $n=2/2$  Fig. 2F). In two specimens, a r4/5 boundary was also present and, in both cases, this correlated with residual *Cek-8* expression in r5, although this expression was not immediately adjacent to the boundary.

The effect on *Krox-20* expression varied with the position of the bead. At 6 hours, a bead placed at r4

level abolished *Krox-20* expression in both r3 and r5 ( $n=1$ , Fig. 2G), and a bead placed at r5 or r6 abolished *Krox-20* transcripts at r5 level only ( $n=2$ ). Surprisingly beads placed at r2 or r3 level, had no effect on r3 expression but complete downregulation in r5 ( $n=2$ ). Beads anterior to r2 or posterior to r6 did not affect *Krox-20* expression. With beads placed at r4, *Krox-20* in both r3 and r5 remains completely downregulated 24 hours after retinoic acid treatment when the embryos have reached stage 15/16 (Fig. 2H,  $n=4/5$ , the fifth embryo had weak expression in r3). Despite the loss of *Krox-20*, the morphological boundaries of r3 were maintained.

In general, *Cek-8* expression was maintained in r3 and abolished in r5 after retinoic acid application, whereas *Krox-20* could be abolished in both r3 and r5. Furthermore, at this stage of development, expression of both *Cek-8* and *Krox-20* in r5 was more sensitive to retinoic acid than expression in their r3 domains. The expression of *Cek-8* in r3 was maintained despite the loss of *Krox-20* transcripts from stage 11/12 onwards, i.e. 6 hours after implanting the bead. Boundary maintenance was strictly correlated with *Cek-8* expression.

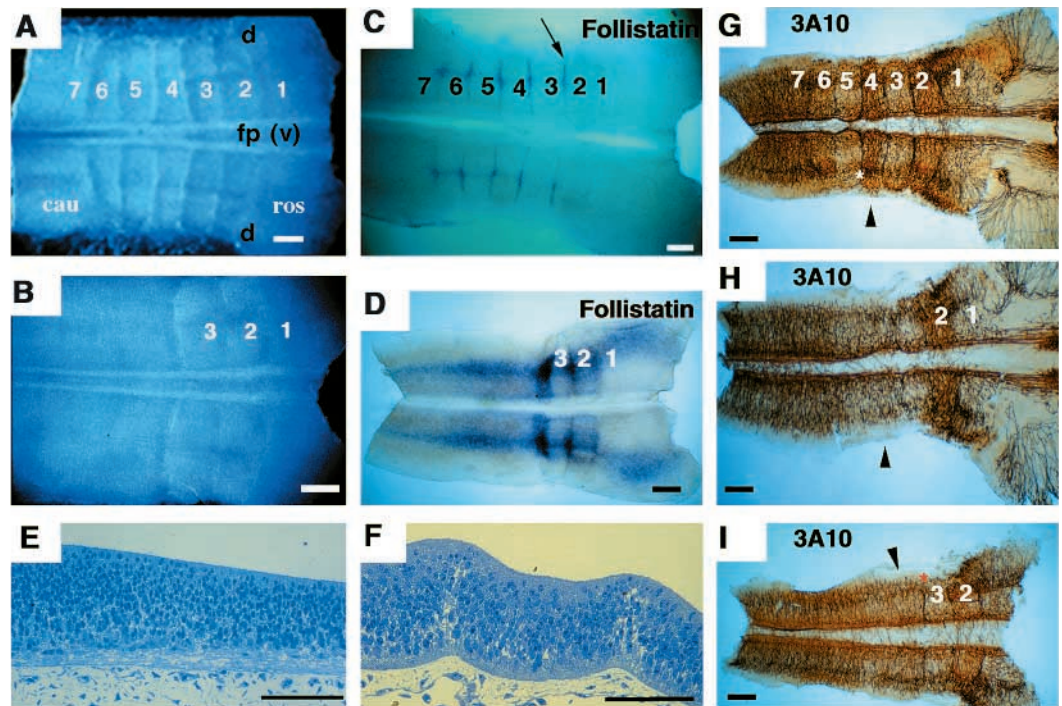

**Fig. 1.** Retinoic acid leads to loss of hindbrain boundaries. All hindbrains shown are flat mounts from stage 18–20 chick embryos. (A) Control hindbrain with seven identifiable rhombomeres (1–7). (B) Retinoic-acid-treated hindbrain, where only three rhombomeres are visible (1–3) and posterior hindbrain is unsegmented. (C) *Follistatin* expression in control hindbrain. Five transverse stripes correlating to rhombomere boundaries 2/3 to 6/7 are visible. (D) Low level of *follistatin* expression is seen in retinoid-treated hindbrain, with anterior border at r1/r2 boundary. Only two transverse stripes of *follistatin* transcripts corresponding to r2/3 and r3/4 boundaries can be seen, apparent stripe at the r1/2 border is shadow caused by boundary not elevated *follistatin* expression. (E) Parasagittal section through caudal region of retinoic-acid-treated hindbrain which shows no periodic boundary specialisations. (F) Parasagittal section of normal stage 18 hindbrain showing two caudal rhombomere boundaries with their characteristic increase in extracellular space. (G) 3A10 neurofilament staining of normal hindbrain. Neuronal differentiation is advanced in r2, r4 (arrowhead) and from r6 onwards and axons accumulate in boundaries (asterisk). (H) 3A10 staining of retinoic-acid-treated hindbrain. Neuronal differentiation is only advanced at r2 level. Position of r4 territory is arrowed. (I) Slightly older retinoic-acid-treated hindbrain that shows axon accumulations (red asterisk) in boundaries of r3 and r4 but not in caudal hindbrain. ros, rostral; cau, caudal; d, dorsal; v, ventral; fp, floor plate. Bar is 150  $\mu$ m in A–D and G–I; 100  $\mu$ m in E and F.

**Hoxb-4, Hoxb-1 and Hoxa-2**

*Hox* genes are thought to confer segment identity and are known to be responsive to retinoic acid. *Hoxb-4* is normally expressed in the neural tube up to the r6/r7 boundary (Fig. 3D). At 16 hours after retinoic acid implants when *Cek-8* and *Krox-20* expression are already affected, *Hoxb-4* expression remained unchanged ( $n=3$ ). But, by 24 hours, the domain was shifted anteriorly to the last visible boundary at the posterior limit of r3 ( $n=3$ , Fig. 3E).

In normal stage 15 embryos, *Hoxb-1* expression is detected at low levels up to the r6/7 boundary and at high level in r4 (Fig. 3A). As with *Hoxb-4*, *Hoxb-1* expression remains unchanged 5-6 hours after retinoic acid treatment ( $n=3$ ). At 24

hours after treatment, *Hoxb-1* was still expressed to a variable level at the r4 level in a width equivalent to one rhombomere while its caudal domain shifted anteriorly to the region of the r5/6 boundary ( $n=5$ , Fig. 3B). At 48 hours, *Hoxb-1* at the r4 level was further down-regulated and the caudal domain again shifted anteriorly to lie close to the r3/4 boundary (Fig. 3C). All hindbrain expression of *Hoxb-1* was reduced to a very low level.

From stage 11, the normal anterior limit of *Hoxa-2* expression is at the r1/2 border and remains until stage 24 (Prince and Lumsden, 1994 and Fig. 3F). *Hoxa-2* is also expressed in the crest that emanates from r4 to populate the second branchial arch. In retinoic-acid-treated hindbrains, the anterior limit of *Hoxa-2* expression was unchanged at the r1/2 border (Fig. 3G). There was uniform expression from the caudal r3 boundary backwards, thus the high levels of expression immediately adjacent to the floor plate in r4 of control brains (Fig. 3F) was lost while those adjacent to the floor plate in r2 and r3 were maintained. *Hoxa-2* continued to be expressed in the second branchial arch of retinoic-acid-treated embryos ( $n=4$ ).

In summary, expression of *Hoxb-4* and the caudal domain of *Hoxb-1* shifted anteriorly in retinoic-acid-treated embryos whereas the anterior expression limit of *Hoxa-2* was unaltered. In contrast to *Cek-8* and *Krox-20*, the changes in *Hoxb-4* and *Hoxb-1* expression domains occur after the loss of posterior boundaries, 24 hours after retinoic acid treatment.

**Precursor dispersal**

We investigated whether loss of boundaries and the molecular changes that follow retinoic acid treatment lead to increased cell dispersal and cell mixing between former neighbouring rhombomeres. We first established the anteroposterior dispersal of labelled cells in individual rhombomeres. Cells in rhombomeres 3, 4 and 5 were labelled with DiI or DiA at stage 10/11 and some embryos treated with retinoic acid and others used as controls. Labelling was performed as close as possible to a boundary (Fig. 4A,B) and, initially, each application usually labelled 5-10 neighbouring cells. 48 hours later labelled cell clusters of various shapes and sizes were seen, ranging from elongated stripes of cells to small oval patches of cells in both control and retinoic-acid-treated specimens. Fig. 5 summarises the results and illustrates that the mean anteroposterior dispersal of neural precursor cells ( $78\pm 6\ \mu\text{m}$ , range 16-155  $\mu\text{m}$  in control brains) was not changed significantly in retinoic-acid-treated embryos ( $85\pm 5\ \mu\text{m}$ , range 16-181  $\mu\text{m}$ ) and amounted to 40% of the width of a rhombomere at stage 19. This was true regardless of how many rhombomeres remained after retinoic acid application.

We next tested whether cells from former rhombomeres retained their relative positions by injecting DiI into r3, close to the r3/r4 boundary, and into r5, close to the r4/r5 boundary in the same embryo and then treating with retinoic acid. After 48 hours, the labelled patches were on average  $220\pm 10\ \mu\text{m}$  apart (range 155-310  $\mu\text{m}$ ,  $n=15$ ). This distance spans at least the normal width of rhombomere 4 at stage 19 (145-224  $\mu\text{m}$  depending on the dorsoventral level) as measured on 11 control embryos. Labelled cells thus remained within their original territory despite the absence of morphological boundaries and there was no significant tissue loss from r4.

To assess cell mixing between r4 and r5, DiA and DiI were

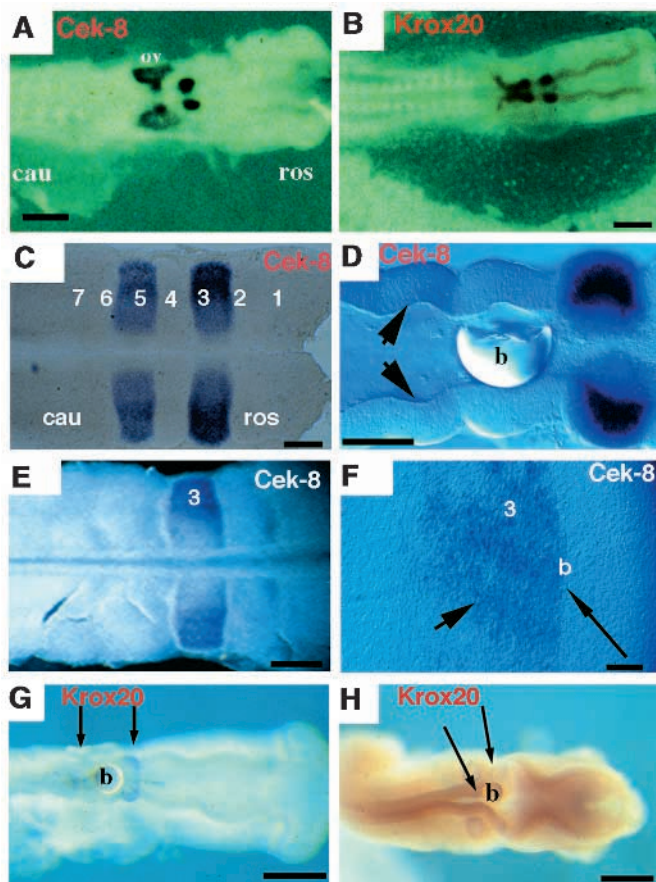

**Fig. 2.** (A) Control stage 10 embryo showing *Cek-8* expression in r3 and r5 and in neural crest derived from r6. (B) Control stage 10 embryo showing *Krox-20* expression in r3 and r5 and in neural crest derived from r6. (C) *Cek-8* is expressed with sharp boundaries in r3 and r5 in flat-mounted control stage 18 hindbrain. (D) r5 domain of *Cek-8* expression is lost (arrowheads) 6 hours after addition of bead (b) at r4 level, r3 domain remains strong. Bead was damaged slightly by dissection. (E) After 48 hours, *Cek-8* expression borders of r3 remain sharp and coincident with morphological boundaries. (F) High power of *Cek-8* expression in retinoid-treated hindbrain that lacked caudal r3 boundary. Lack of morphological boundary coincides with fuzzy border to *Cek-8* (short arrow), rostral border of expression (long arrow) is sharp and matches morphological boundary (b). (G) *Krox-20* is downregulated in both r3 and r5 (arrows) when retinoic acid is applied at r4 and all expression is lost (arrows) by stage 14 (H). Bar is 500  $\mu\text{m}$  in A, B, G and H; 200  $\mu\text{m}$  in C-E; 50  $\mu\text{m}$  in F.



**Fig. 3.** *Hox* gene expression shown in flat-mounted hindbrains from stage 15–20 chick embryos.

(A) *Hoxb-1* is expressed up to r6 and also in r4 in normal stage 15 hindbrain. Bidirectional arrow indicates gap between two expression domains. (B) *Hoxb-1* is still expressed in r4 24 hours after retinoic acid treatment in hindbrain with 4 rhombomeres remaining, but gap to more posterior domain is reduced (bidirectional arrow).

(C) By 48 hours, *Hoxb-1* expression in r4 is lost and low level expression in caudal domain has shifted anteriorly to lie close to r3/4 boundary (arrow). (D) *Hoxb-4* is expressed up to 6/7 boundary (arrow) in normal stage 15 hindbrain. (E) After 24 hours of retinoic acid treatment anterior limit of *Hoxb-4* expression is shifted anteriorly to r3/4 boundary (arrows).

(F) Normal anterior expression limit of *Hoxa-2* lies at the r1/r2 boundary. (G) Anterior expression limit is unchanged 48 hours after retinoic acid treatment, but the high level of expression normally present next to floor plate in r4 is lost. Bar is 200  $\mu\text{m}$  in A, B, C, F and G, and 400  $\mu\text{m}$  in D and E.

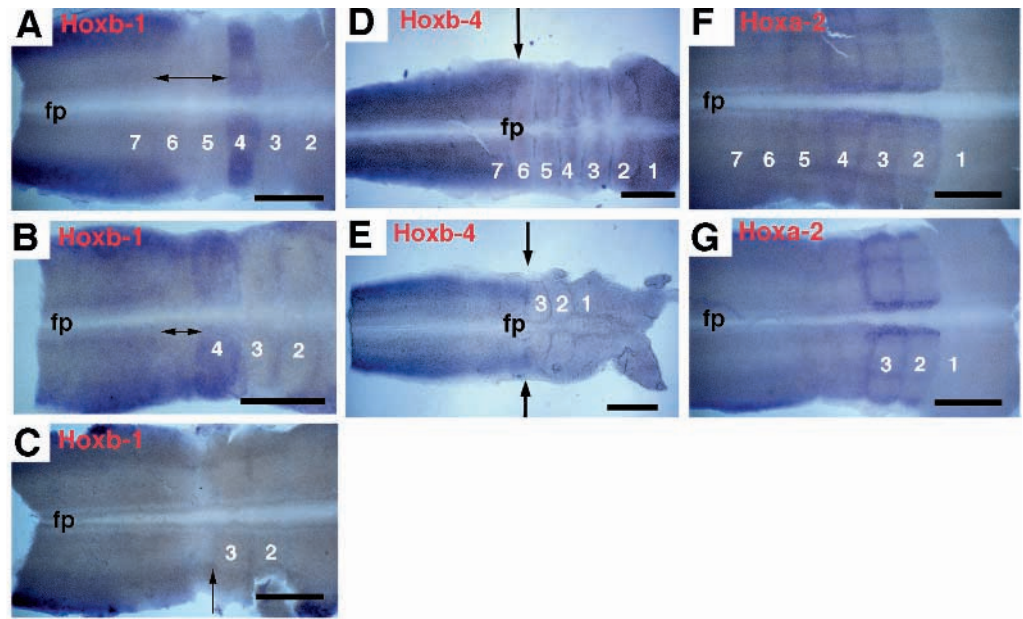

injected on either side of the r4/5 boundary (Fig. 4B). We measured the distance between the injections using a cooled CCD camera and Biovision software and embryos were treated with retinoic acid and examined 48 hours later. The descendants of cells that are initially closer than the average dispersal of 40% of a rhombomere's width should have the possibility to mix. Since 40% of a stage 10/11 rhombomere is 56  $\mu\text{m}$ , we analysed the results from 14 pairs of injections that were less than 56  $\mu\text{m}$  apart in hindbrains in which the r4/5 boundary was abolished. In 12/14 embryos, despite the absence of a morphological boundary, no cell mixing was seen. In eight embryos, the two labelled clusters were separated by a thin stripe of unlabelled cells (Fig. 4D). In four cases, the two labelled clusters abut one another at a fuzzy interface but no intermingling could be seen (Fig. 4E). Intermingling of labelled cells over the whole of the interface of the two populations was only apparent in one embryo (Fig. 4G), where the maximum overlap was 20  $\mu\text{m}$ , and in one further embryo a few intermingling cells were seen at the interface (Fig. 4F).

To ensure that our injections were close enough not only to each other but also to the boundary, we made injections close to the r4/r5 boundary in untreated embryos and analysed how many labelled cells spread up to the boundary over the subsequent 48 hours. In 13/23 cases fluorescent cells had spread at least up to the boundary. Furthermore cell mixing within a normal rhombomere was tested by injecting DiI towards the anterior and DiA towards the posterior boundary of r4. In this test, cell mixing within a rhombomere occurred in 50% (4/8) of cases, although it was not extensive (Fig. 4C). In the cases where labelled clusters did not mix, the original injections were more than 56  $\mu\text{m}$  (40% of a rhombomeres width) apart.

### Organisation of branchiomotor nuclei

The anterior shifts in *Hoxb-4* and *Hoxb-1* expression suggest

that the affected rhombomeres may have been posteriorised and the lack of boundary cells raises the possibility that the organisation of branchiomotor nuclei normally segregated at a boundary may be disrupted. To address these questions, we performed retrograde labelling studies from cranial nerves at 48 hours (stage 19/20) and 3A10 antibody staining at 48 and 72 hours (stage 23–25) after retinoic acid treatment. At these times, cells at former r4, r5 and r6 levels have been expressing *Hoxb-4* for 24 and 48 hours, respectively. In normal embryos, the VIIth (facial) nerve root is located at r4 level and recruits its motor neurons from r4 and r5, whilst cell bodies of motor neurons contributing to the IXth (glossopharyngeal) nerve are found in r6 and r7. There is normally little or no spatial overlap between these two branchiomotor nuclei (Fig. 6A,B). In retinoid-treated hindbrains, there was only a slight increase in the spatial overlap of the facial and the glossopharyngeal nuclei (Fig. 6C–E). The maximum overlap that we found (Fig. 6D) was equivalent to 10% of the total anteroposterior extent of the facial nucleus and usually restricted to less than 10 overlapping cells from each nucleus.

In agreement with Gale et al. (1996), the number of contralateral vestibulo-acoustic (CVA) neurons located in the floor plate at the level of r4 was markedly reduced in retinoic-acid-treated embryos (Fig. 6C). Somewhat surprisingly, we found the motor neurons in r3 were altered by retinoic acid treatment. Normally all r3 motor neurons would contribute to the trigeminal nerve root on r2 but, in retinoic-acid-treated embryos, the number of r3 neurons labelled from the trigeminal was reduced and a significant number of r3 motor neurons were labelled by DiI application to the facial root on r4 (Fig. 6F). Combined facial and trigeminal fills demonstrated a relative lack of motor neurons in r3 (data not shown). The contribution of r3 neurons to the facial root was despite the presence of a r3/4 boundary (Fig. 6F).

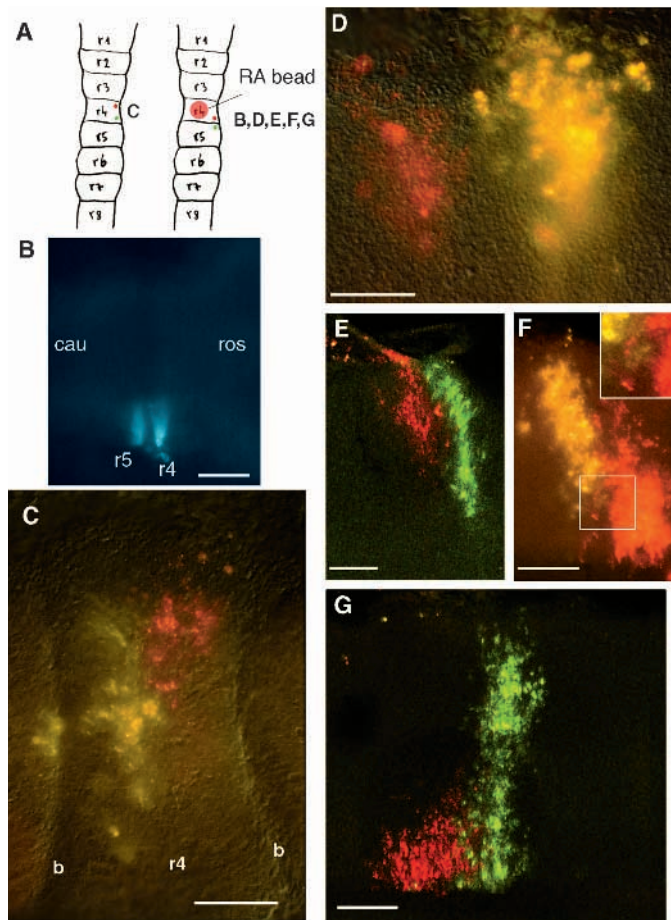

**Fig. 4.** (A) Schematic diagram of labelling experiments. Cells were labelled with DiI and DiA within rhombomere 4 to assess cell mixing within one rhombomere in normal embryos (left). Cells were labelled on either side of rhombomere 4/5 boundary and retinoic acid bead was added at r4 to assess mixing after boundary loss (right). (B) Fluorescent cells are seen on either side of the r4/5 boundary immediately after labelling. (C) DiI- (red) and DiA- (yellow) labelled clusters were derived from two injections within rhombomere 4 of normal embryo. Virtually no mixing is seen. (D-G) Four examples of clusters derived from cells on either side of r4/5 boundary in retinoic-acid-treated embryos. (D) Dorsal clusters are separated by a narrow band of unlabelled cells. (E) Clusters are adjacent at a fuzzy interface but cells have not intermingled. (F) Clusters are adjacent but only a few cells have intermingled (enclosed area enlarged in inset). (G) Some mixing has occurred between ventral (red) cluster and more dorsoventrally dispersed (green) cluster. (C-G) Rostral is to the left, dorsal at the top and floor plate at bottom of micrograph; (E,G) confocal micrographs focussed near ventricular surface, (C,D,F) conventional epifluorescence microscopy. RA, retinoic acid; cau, caudal; ros, rostral; b, boundary. Bar is 150  $\mu$ m for B, 75  $\mu$ m for C, 100  $\mu$ m for D,F and 50  $\mu$ m for E, G.

Normally the exit point of the facial nerve is restricted to a tightly defined region on r4 (Fig. 6A) but, in retinoic-acid-treated embryos, retrograde labelling demonstrated that the facial nerve exits from a line stretching from r4 down into r5 (Fig. 6G). The facial exit point was transformed to an 'exit line' in 7/8 cases and, in one case, even fused with the trigeminal exit point. The transformation of the r4 exit point to an exit line stretching into r5 that resembles the exit line on r6 and r7 for the glossopharyngeal

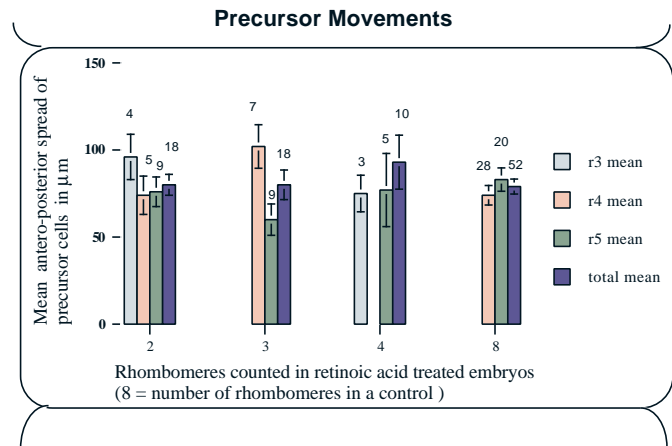

**Fig. 5.** Precursor dispersal in control and retinoic-acid-treated embryos. Categories 2-4 in the x-axis refer to number of rhombomeres remaining in experimental embryos, category 8 is control embryos. Values are means ( $\pm$  s.e.m.) from  $n$  specimens (indicated above columns). Within each category, data are presented for cells labelled in particular rhombomeres (r3, r4, r5) together with a mean for all positions. Measurements are displayed within a representation of a rhombomere, indicating that precursor cells disperse on average 40% of the width of a rhombomere.

ryngeal motor axons. It is possible that, since exit points are marked by local accumulations of neural crest which may be instructive for the patterning of motor axons (Niederlander et al., 1996), this change in exit points may be caused by the alterations in neural crest migration previously demonstrated in RA-treated hindbrains (Lee et al., 1995; Gale et al., 1996).

### Organisation of cranial nerves in the periphery

We analysed the peripheral organisation of the cranial nerves by studying normal and retinoic-acid-treated embryos stained with the monoclonal antibody 3A10. In general, the distribution of trigeminal, facial/vestibulocochlear, abducens, glossopharyngeal and vagal nerves looked fairly normal (Fig. 6H-K). However, the normally compact exit point of the facial root split into series of rootlets in retinoic-acid-treated embryos (Fig. 6I) and this confirmed our finding of an 'exit line' in the retrograde analysis. Also anastomoses between glossopharyngeal and vagal nerves were common (Fig. 6I,  $n=4/8$ ) and, occasionally, a nerve bridge between the facial root and trigeminal ganglion was present. Retrograde labelling showed this bridge to contain motor axons from both the trigeminal and the facial roots.

## DISCUSSION

### Precursor movements in hindbrains lacking boundary cells

With only a few exceptions (Birgbauer and Fraser, 1994), cells of adjacent rhombomeres do not mix in normal embryos (Fraser et al., 1990; Guthrie et al., 1993). We have explored whether loss of boundary cells and segmental gene expression in retinoic-acid-treated embryos leads to increased mixing between cells that derive from adjacent rhombomeres. This question has not been addressed in previous reports of mor-



phologically unsegmented hindbrains. In the absence of boundaries, we detect no change in the overall anteroposterior dispersal of precursor cells and, in most cases, no substantial mixing between cells of former rhombomeric units. While we cannot rule out the possibility that a small increase in mixing occurs precisely at the position of the former boundaries, our observations seem to rule out a substantive role for boundary cells in the restriction of anteroposterior cell dispersal and mixing. This supports the original suggestion of Fraser et al. (1990) that clones of cells spread up to the middle of rhombomere boundaries rather than only up to the zone of boundary cells, and is consistent with the idea that lineage restriction can be maintained by processes other than a mechanical barrier composed of boundary cells (Guthrie and Lumsden, 1991; Guthrie et al., 1993).

Our data lend support to the proposal that the principal mechanism of lineage restriction at boundaries is the expression of alternating surface properties on cells from odd- and even-numbered rhombomeres (Guthrie et al., 1993; Wingate and Lumsden, 1996). The nature of these surface properties remains largely unknown but may be similar to the calcium-dependent mechanisms that *in vitro* can segregate cells taken from distinct regions of the forebrain (Götz et al., 1996). Either repulsive interactions between odd and even cells and/or preferential adhesion between like cells could be involved. The expression domains of both *Krox-20* and *Cek-8* prior to morphological segmentation suggests they could play a role in establishing the alternating cellular properties responsible for lineage restriction. The segmental defects that follow dominant negative inhibition of the zebrafish ortholog of *Cek-8* could be explained by increased cell movement (Xu et al., 1995), but this has not been demonstrated directly. Our finding that down-regulation of *Cek-8* and *Krox-20* in r5 does not lead to an increase in cell movement suggests that other factors can maintain the restrictions to cell movement. *Cek-8*, for example, could normally work in conjunction with other segmentally expressed members of the Eph-like receptor tyrosine kinase family (Becker et al., 1994; Bergeman et al., 1995; Flenniken et al., 1996) which may not be affected by retinoic acid treatment.

### Loss of boundary cells

Under experimental conditions, boundaries develop at the interface of rhombomeres with divergent properties (Guthrie and Lumsden, 1991). In general, no boundaries form when rhombomeres of the same kind are juxtaposed. One interpretation of the loss of boundaries in the retinoic-acid-treated hindbrain is that the divergent properties necessary for boundary formation and maintenance have been lost. We find that boundary loss is closely correlated with and preceded by

down-regulation of *Cek-8* suggesting that signalling through this receptor tyrosine kinase may be important for boundary initiation and maintenance. However, since cell mixing between former rhombomeric units is still restricted in retinoic acid hindbrains, the cell properties that prevent mixing must still be present and this suggests that these properties differ from those required for

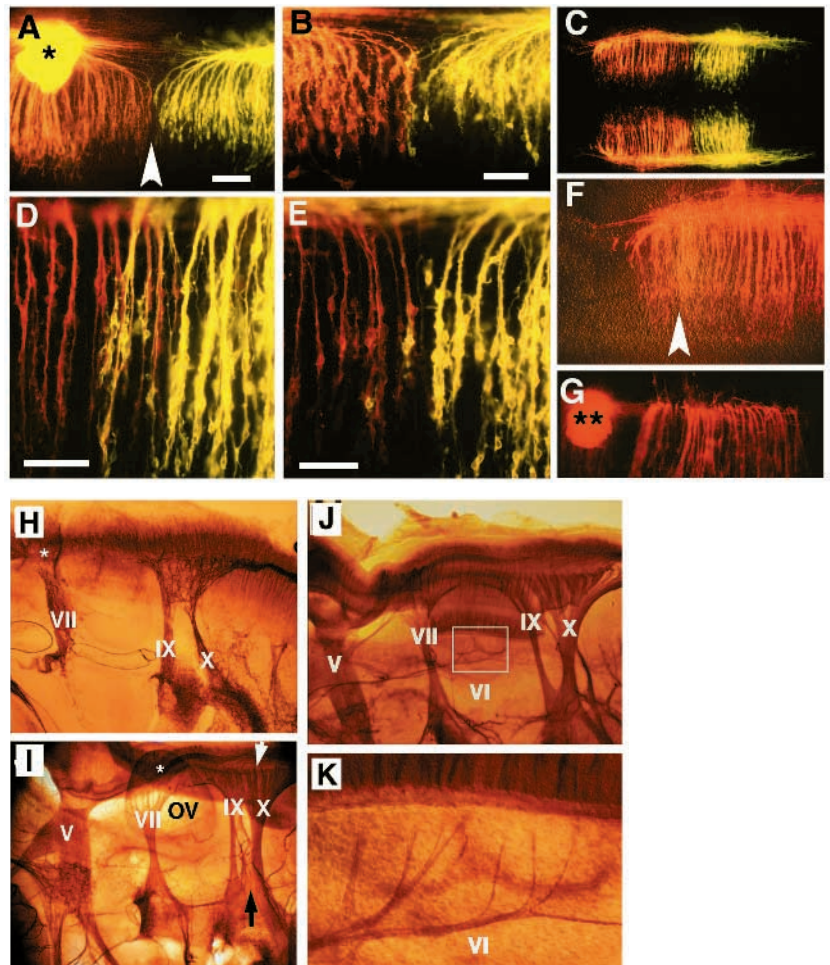

**Fig. 6.** Organisation of cranial nerves. (A-G) Retrograde labelling from VII/VIII nerve root with DiI (red) and from IX root with DiA (yellow). (A) Control fills to show lack of overlap between red and yellow motor neurons. Arrow marks r5/6 boundary. Asterisk marks compact exit point of VII/VIII nerve. (B) Higher power of another control that shows minimal spatial overlap of red and yellow cells at r5/6 boundary. (C) Low-power micrograph to show overall organisation of facial and glossopharyngeal neurons on both left and right sides of retinoic-acid-treated embryo. There is little or no overlap between red and yellow cells. (D,E) High-power view of two retinoic-acid-treated hindbrains both of which show limited spatial overlap of red and yellow cells. (F) Motor neurons filled in r3 from VII/VIII root in retinoic-acid-treated hindbrain. Same specimen as in C. Arrow marks r3/4 boundary. (G) Compact exit point of trigeminal root (\*\*\*) and exit 'line' of facial root to right in retinoic-acid-treated hindbrain. Compare exit line to VII/VIII exit point asterisked in A. (H) 3A10 staining reveals peripheral organisation of VII, IX and X nerves in control embryo. Compact exit point of VII nerve is asterisked. (I) Retinoic-acid-treated embryo reveals VII exit point (asterisk) now resembles exit line of IX/X (white arrow) for VII nerve and anastomoses between IX and X nerves (black arrow). (J) Low-power view of retinoic-acid-treated embryo showing normal position of abducens nerve roots, which are shown at higher power in K. V, trigeminal; VI, abducens; VII, facial; IX, glossopharyngeal; X, vagus; OV, otic vesicle. Bar is 100  $\mu$ m for A and B, 40  $\mu$ m for D and E.

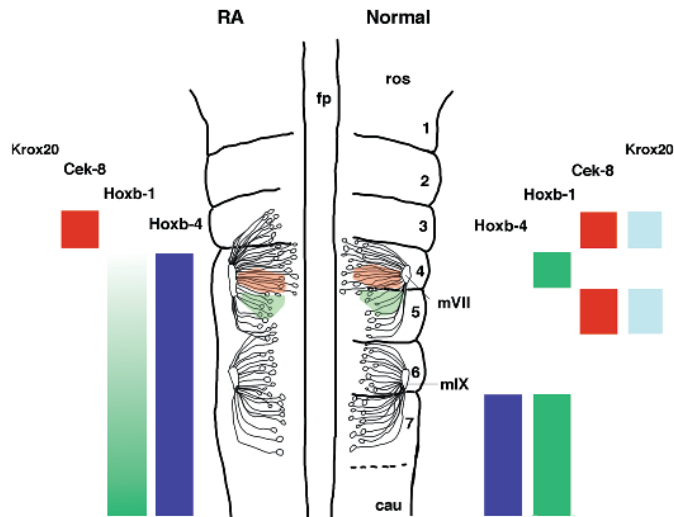

**Fig. 7.** Summary diagram of segmentation, branchiomotor nuclei organisation and gene expression in normal (right) and retinoic-acid-treated hindbrain (left). Caudal part of retinoic-acid-treated hindbrain is unsegmented. Brown and light green patches within hindbrain represent clusters of cells derived from adjacent rhombomeres. fp, floor plate; mVII and mIX, exit points of facial and glossopharyngeal nerves

boundary formation. Retinoic acid treatment may therefore alter the cell surface differences that normally maintain boundaries but not those that prevent cell mixing.

In contrast to *Cek-8*, loss of *Krox-20* expression did not correlate with loss of segmentation. We observed a complete loss of *Krox-20* expression in both r3 and r5 but the r2/r3 and usually the r3/r4 boundary remained in retinoid-treated hindbrains. Analysis of *Krox-20* null mutant mice demonstrates its requirement for the correct development of r3 and r5 (Schneider-Manouri et al., 1993, 1997); it also controls some aspects of the expression of *Hoxa-2* (Nonchev et al., 1996) and *Hoxb-2* (Sham et al., 1993) and the early phases of *Cek-8* expression (Thiel, T., Gilardi, P., Charnay, P. and Wilkinson, D. G., unpublished). Our results are consistent with the view that *Krox-20* plays a role in establishing the identity of r3 (see later), but that its continued expression is not required for the maintenance of segmentation.

### Plasticity of *Hox* gene expression and neuronal organisation in hindbrains lacking boundary cells

A summary of the retinoic-acid-induced changes to neuronal organisation and *Hox*, *Krox-20* and *Cek-8* expression is given in Fig. 7. *Hox* genes are thought to impart segment identity to individual rhombomeres. In our experiments, the domains of *Hoxb-1* and *Hoxb-4*, in contrast to those of *Cek-8* and *Krox-20*, are not altered until after morphological segmentation is lost. Then *Hoxb-4* shifts anteriorly up to the posterior boundary of r3 and an anterior shift in the caudal domain of *Hoxb-1* also occurs together with the down-regulation of its r4 domain. The relatively delayed shift in *Hox* expression suggests that this response may not be a direct one. A more speculative suggestion is that the ectopic, anterior shift in expression occurs as a wave spreading forward in the plane of the neuroepithelium from its original domain and that the progress of this spreading expression is initially obstructed by the presence of rhombomere

boundaries. Boundary cells have reduced junctional communication (Martinez et al., 1992) and this has been proposed to limit the spread of small inductive signalling molecules (Martinez et al., 1995). Perhaps in this way boundaries normally help maintain the long-term stability of *Hox* expression borders.

At stage 10, rhombomeric *Hox* expression and the phenotype of r4 efferent neurons appears to be irreversibly fixed when grafted to ectopic more anterior locations (Guthrie et al., 1992; Kuratani and Eichele, 1993; Simon et al., 1995; Grapin-Botton et al., 1995). However, *Hox* expression can be altered at this stage by grafting somites next to the hindbrain and within grafts moved from anterior to posterior locations (Itasaki et al., 1996), but whether these late changes in *Hox* expression are accompanied by alterations to neuronal organisation is uncertain. Our results demonstrate that the spatial regulation of at least two *Hox* genes, *Hoxb-1* and *Hoxb-4*, can be altered by the exogenous application of retinoic acid to the hindbrain at stages 10–11. Here the late changes in *Hox* expression do not appear to have altered the early organisation of facial (r4/5) and glossopharyngeal (r6/7) efferent neurons nor the appearance of the abducens motor nucleus (r5/6). If these aspects of regional identity are controlled by *Hox* genes, they must have been determined before stage 15, as this is the time that *Hox* expression is altered (20 hours after retinoic acid treatment) and maintained despite changes in expression after this time. In contrast to this, the CVA neurons characteristic of r4 are lost (our data and previously shown by Gale et al., 1996) suggesting their identity may be more plastic. Mutations of the *Hoxb-1* gene have shown that the contralateral migration of CVA neurons is dependent on expression of this gene (Studer et al., 1996).

We also find that some of the motor neurons in r3 are altered such that their axons exit via the facial nerve rather than the trigeminal. Similar alterations in r3 motor neurons are seen in mouse embryos exposed to retinoic acid during gastrulation and early neurulation (Marshall et al., 1992; Kessel, 1993) but, in these cases, this was accompanied by ectopic expression of *Hoxb-1* in r2 and/or r3. In contrast, by studying the expression of *Hoxa-2*, *Hoxb-1* and *Hoxb-4*, we did not detect any changes in *Hox* expression in r3. This alteration in motor neuron phenotype is however anticipated by the early loss of *Krox-20* expression from r3 and is consistent with the view that *Krox-20* plays a role in establishing the identity of this rhombomere (Schneider-Manouri et al., 1993, 1997). Loss of *Krox-20* may be accompanied by the loss of ‘odd-ness’ or ‘three-ness’ from r3 and its motor neurons may therefore be attracted equally to the two ‘even’ exit points on either side.

Since our analysis has been carried out only 24 hours after the alterations in *Hox* gene expression and before the migrations and condensations of motor nuclei are complete, it is possible that other changes in neuronal organisation would become apparent in retinoic-acid-treated brains analysed at more mature stages of development. However, the loss of CVA neurons and alterations to r3 motor neurons demonstrate that some phenotypic changes can occur within the time scale of our observations. The use of specific markers for motor neuron subsets might also reveal patterns of respecification not apparent with the retrograde labelling analysis.

### The effect of retinoic acid is variable, depending on dose, time and method of application

Non-localised applications of retinoic acid during gastrulation



and early neurulation commonly result in a dose-dependent disruption and/or respecification of segmentation specifically in the anterior hindbrain of several species (see for example Durston et al., 1989; Papalopulu et al., 1991; Marshall et al., 1992; Wood et al., 1994; Hill et al., 1995). Our results suggest that after hindbrain segmentation is established the sensitivity to retinoic acid shifts to the posterior hindbrain and the anterior hindbrain is largely unaffected.

The method of delivery of retinoic acid to the hindbrain appears to be influential for the resulting phenotype as our results differ to those previously reported by Gale et al. (1996). In both studies the treatment was performed at the same time (stage 10) and at the same location (r4). Whilst Gale et al. (1996) injected a pulse of retinoic acid, we applied retinoic acid from slow-release beads which provide a continuous steady state release for a prolonged period. In their retinoic-acid-treated embryos, segmentation was unaffected and *Krox-20* is expressed in r3, r4 and r5 and *Hoxb-1* expression is diminished in r4 but normal posteriorly. However, in agreement with our results, they also see a reduction of CVA neurons at r4 level and suggest that r4 is neither lost nor respecified, but rather that there are some alterations of its individual characteristics. The differences in phenotype could be accounted by a later response to retinoic acid mediated by the longer release from the beads.

### Lack of segmentation

Lack of morphological segmentation in the posterior hindbrain described here is similar to the unsegmented hindbrains observed in *kreisler* and *Hoxa-1* mutant mice (McKay et al., 1994; Mark et al., 1993) and also in vitamin A-deficient quail embryos (Maden et al., 1996). The partly unsegmented hindbrains of *kreisler* and *Hoxa1*<sup>-/-</sup> mice as well as vitamin A-deficient quails are due to the lack of development of some or all posterior rhombomeres. In contrast, it seems that, in our study, loss of morphological segmentation is a consequence of the loss of only boundary cells and not whole rhombomeres.

### So what do boundary cells do?

Boundary cells do not appear to play a substantial role in the restriction of cell movement at the borders between rhombomeres. They are the site of local accumulations of circumferential axons in the hindbrain (Lumsden and Keynes, 1989; Heyman et al., 1993, 1995) and these accumulations are lost when boundaries are lost; however, the significance of this role in axonal organisation is not yet understood. Possible roles for boundary cells are either that they form a structural scaffold of specialised glial cells, which may be important for axon and neuronal patterning or that they constitute centres for the generation of particular cell types (Wilson et al., 1993; Heyman et al., 1995). The fate of boundary cells is not known.

We thank Marty Cohn, Lynda Erskine and Ian MacKay for helpful comments on the manuscript. This work was supported by the Wellcome Trust (R. N. and J. D. W. C.) and the MRC (K. P. D. W. and R. K.).

### REFERENCES

Becker, N., Seitaniidou, T., Murphy, P., Mattei, M. G., Topilko, P., Nieto, M. A., Wilkinson, D. G., Charnay, P. and Gilardi-Hebenstreit, P. (1994). Several receptor tyrosine kinase genes of the Eph family are segmentally expressed in the developing hindbrain. *Mech. Dev.* **47**, 3-17.

Bergeman, A. D., Cheng, H. J., Brambilla, R., Klein, R. and Flanigan, J. G. (1995). ELF-2, a new member of the Eph ligand family, is segmentally expressed in mouse embryos in the region of the hindbrain and newly forming somites. *Mol. Cell. Biol.* **15**, 4921-4929.

Birgbauer, E. and Fraser, S. E. (1994). Violation of cell lineage restriction compartments in the chick hindbrain. *Development* **120**, 1347-1356.

Burke, A. C., Nelson, C. E., Morgan, B. A. and Tabin C. (1995). *Hox* genes and the evolution of vertebrate axial morphology. *Development* **121**, 333-346.

Clarke, J. D. W. and Lumsden, A. (1993). Segmental repetition of neuronal phenotype sets in the chick embryo hindbrain. *Development* **118**, 151-162.

Conolly, D. J., Patel, K., Selei, E. A., Wilkinson, D. G. and Cooke, J. (1995). Cloning, sequencing, and expressional analysis of the chick homologue of follistatin. *Dev. Genet.* **17**, 65-77.

Duboule, D. and Dolle, P. (1989). The structural and functional organization of the murine HOX gene family resembles that of *Drosophila* homeotic genes. *EMBO J.* **8**, 1497-1505.

Durston, A. J., Timmermans, J. P. M., Hage, V. J., Hendriks, H. F. J., de Vries, N. J., Heideveld, M. and Nieuwkoop, P. D. (1989). Retinoic acid causes anteroposterior transformation in the developing central nervous system. *Nature* **340**, 140-144.

Eichele, G., Tickle, C. and Alberts, B. M. (1984). Microcontrolled release of biologically active compounds in chick embryos: Beads of 200 µm diameter for the local release of retinoids. *Analyt. Biochem.* **142**, 542-555.

Flenniken, A., Gale, N., Yancopoulos, G. and Wilkinson, D. (1996). Distinct and overlapping expression patterns of ligands for Eph-related receptor tyrosine kinases during mouse embryogenesis. *Dev. Biol.* **179**, 382-401.

Fraser, S., Keynes, R. and Lumsden, A. (1990). Segmentation in the chick embryo hindbrain is defined by cell lineage restriction. *Nature* **344**, 431-435.

Gale, E., Prince, V., Lumsden, A., Clarke, J., Holder, N. and Maden, M. (1996). Late effects of retinoic acid on neural crest and aspects of rhombomere identity. *Development* **122**, 783-793.

Götz, M., Wizenmann, A., Reinhardt, S., Lumsden, A. and Price, J. (1996). Selective adhesion of cells from different telencephalic regions. *Neuron* **16**, 551-564.

Graham, A., Papalopulu, N. and Krumlauf, R. (1989). The murine and *Drosophila* Homeobox gene complexes have common features of organization and expression. *Cell* **57**, 367-378.

Grappin-Botton, A., Bonnin, M.-A., McNaughton, L. A., Krumlauf, R. and Le Douarin, N. M. (1995). Plasticity of transposed rhombomeres: Hox gene induction is correlated with phenotypic modifications. *Development* **121**, 2707-2721.

Guthrie, S., Butcher, M. and Lumsden, A. (1991). Patterns of cell division and interkinetic nuclear migration in the chick embryo hindbrain. *J. Neurobiol.* **22**, 742-754.

Guthrie, S. and Lumsden, A. (1991). Formation and regeneration of rhombomere boundaries in the developing chick hindbrain. *Development* **112**, 221-229.

Guthrie, S., Muchamore, I., Marshall, H., Kuroiwa, A., Krumlauf, R. and Lumsden, A. (1992). Neuroectodermal autonomy of *Hox-2.9* expression revealed by rhombomere transpositions. *Nature* **356**, 157-159.

Guthrie, S., Prince, V. and Lumsden, A. (1993). Selective dispersal of avian rhombomere cells in orthotopic and heterotopic grafts. *Development* **118**, 527-538.

Hamburger, V. and Hamilton, H. L. (1951). A series of normal stages in the development of the chick embryo. *J. Morphol.* **88**, 105-125.

Heyman, I., Kent, A. and Lumsden, A. (1993). Cellular morphology and extracellular space at rhombomere boundaries in the chick embryo hindbrain. *Dev. Dyn.* **198**, 241-253.

Heyman, I., Faissner, A. and Lumsden, A. (1995). Cell and matrix specialisation of rhombomere boundaries. *Dev. Dyn.* **204**, 301-315.

Hill, J., Clarke, J. D. W., Vargesson, N., Jowett, T. and Holder, N. (1995). Exogenous retinoic acid causes specific alterations in the development of the midbrain and hindbrain of the zebrafish embryo including positional respecification of the Mauthner neuron. *Mech. Dev.* **50**, 3-16.

Irving, C., Nieto, A. M., DasGupta, R., Charnay, P. and Wilkinson, D. G. (1996). Progressive spatial restriction of *Sek-1* and *Krox-20* gene expression during hindbrain segmentation. *Dev. Biol.* **173**, 26-38.

Itasaki, N., Sharpe, L., Morrison, A. and Krumlauf, R. (1996). Reprogramming Hox expression in the vertebrate hindbrain: influence of paraxial mesoderm and rhombomere transposition. *Neuron* **16**, 487-500.

Kessel, M. (1993). Reversal of axonal pathways from rhombomere 3 correlates with extra *Hox* expression domains. *Neuron* **10**, 379-393.

Kuratani, S. C. and Eichele, G. (1993). Rhombomere transplantation

- repatterns the segmental organisation of cranial nerves and reveals cell-autonomous expression of a homeodomain protein. *Development* **117**, 105-117.
- Lee, Y. M., Osumi-Yamashita, N., Ninomiya, Y., Moon, C. K., Erikson, U. and Eto K. (1995). Retinoic acid stage-dependently alters the migration pattern and identity of hindbrain neural crest. *Development* **121**, 825-837.
- Lumsden, A. and Keynes, R. (1989). Segmental patterns of neuronal development in the chick hindbrain. *Nature* **337**, 424-428.
- Lumsden, A. (1990). The cellular basis of segmentation. *Trends Neuroscience* **13**, 329-335.
- Lumsden, A., Sprawson N. and Graham A. (1991). Segmental origin and migration of neural crest cells in the chick hindbrain. *Development* **113**, 1281-1291.
- Maden, M., Gale, E., Kostetsii, I. and Zile, M. (1996). Vitamin A deficient quail embryos have half a hindbrain and other neural defects. *Current Biology* **6**, 417-426.
- Mark, M., Lufkin, T., Vonesch, J.-L., Ruberte, E., Olivo, J.-C., Dolle, P., Gorry, P., Lumsden, A. and Chambon P. (1993). Two rhombomeres are altered in *Hoxa-1* mutant mice. *Development* **119**, 319-338.
- Marshall, H., Nonchev, S., Sham, M. H., Muchamore, I., Lumsden, A. and Krumlauf, R. (1992). Retinoic acid alters hindbrain Hox code and induces transformation of rhombomeres 2/3 into a 4/5 identity. *Nature* **360**, 737-741.
- Martinez, S., Geijo, E., Sanchez-Vives, V., Puelles, L. and Gallego, R. (1992). Reduced functional permeability at interrhombomeric boundaries. *Development* **116**, 1069-1076.
- Martinez, S., Marin, F., Nieto, M. A. and Puelles, L. (1995). Induction of ectopic engrailed expression and fate change in avian rhombomeres: intersegmental boundaries as barriers. *Mech. Dev.* **51**, 189-303.
- McKay, I., Muchamore, I., Krumlauf, R., Maden, M., Lumsden, A. and Lewis, J. (1994). The *kreisler* mouse: a hindbrain segmentation mutant that lacks two rhombomeres. *Development* **120**, 2199-2211.
- Niederlander, C. and Lumsden, A. (1996). Late emigrating neural crest cells migrate specifically to the exit points of cranial branchiomotor nerves. *Development* **122**, 2367-2374.
- Nieto, A., Gilardi-Hebenstreit, P., Charnay P. and Wilkinson, D. G. (1992). A receptor protein tyrosine kinase implicated in the segmental patterning of the hindbrain and mesoderm. *Development* **116**, 1137-1150.
- Nieto, M. A., Patel, K. and Wilkinson, D. G. (1996). In situ hybridisation analysis of chick embryos in whole mount and tissue sections. In *Methods in Avian Embryology*. (ed. M. Bronner-Fraser) San Diego: Academic Press.
- Nonchev, S., Vesque, C., Maconochie, M., Seitanidou, T., Ariza-McNaughton, L., Frain, M., Marshall, H., Sham, M. H., Krumlauf, R. and Charnay, P. (1996). Segmental expression of *hoxa-2* in the hindbrain is directly regulated by *Krox-20*. *Development* **122**, 543-554.
- Papalopulu, N., Clarke, J. D. W., Bradley, L., Wilkinson, D., Krumlauf, R. and Holder N. (1991). Retinoic acid causes abnormal development and segmental patterning of the anterior hindbrain in *Xenopus* hindbrains. *Development* **113**, 1145-1159.
- Prince, V. and Lumsden, A. (1994). *Hoxa-2* expression in normal and transposed rhombomeres: independent regulation in the neural tube and neural crest. *Development* **120**, 911-923.
- Sajjadi, F. G. and Pasquale, E. B. (1993). Five novel avian eph-related tyrosine kinases are differentially expressed. *Oncogene* **8**, 1807-1813.
- Schneider-Manouri, S., Topilko, P., Seitanidou, T., Levi, G., Cohen-Tannoudji, M. Pournin, S., Babinet, C. and Charnay P. (1993). Disruption of *Krox-20* results in alterations of rhombomeres 3 and 5 in the developing hindbrain. *Cell* **75**, 1199-1214.
- Schneider-Manouri, S., Seitanidou, T., Charnay, P. and Lumsden, A. (1997). Segmental and neuronal architecture of the hindbrain of *Krox-20* mouse mutants. *Development* **124**, 1215-1226.
- Sham, M.H., Vesque, C., Nonchev, S., Marshall, H., Frain, M., Das Gupta, R., Whiting, J., Wilkinson, D., Charnay, P. and Krumlauf, R. (1993). The zinc finger gene *Krox-20* regulates *Hox-B2* during hindbrain segmentation. *Cell* **72**, 183-196.
- Simon, H., Hornbruch, A. and Lumsden, A. (1995). Independent assignment of antero-posterior and dorso-ventral positional values in the developing chick hindbrain. *Curr. Biol.* **5**, 205-214.
- Studer, M., Popperl, H., Marshall, H., Kuroiwa, A. and Krumlauf, R. (1994). Role of a conserved retinoic acid response element in rhombomere restriction of *Hoxb-1*. *Science* **265**, 1728-1732.
- Studer, M., Lumsden, A., Ariza-McNaughton, L., Bradley, A. and Krumlauf, R. (1996). Altered segment identity and abnormal migration of motor neurons in mice lacking *Hoxb-1*. *Nature* **384**, 630-634.
- Tickle, C., Lee, J. and Eichele G. (1985). A quantitative analysis of the effect of all-trans retinoic acid on the pattern of chick limb development. *Dev. Biol.* **109**, 82-95.
- Wilkinson, D. G., Bhatt, S., Chavrier, P., Bravo, R. and Charnay P. (1989a). Segment-specific expression of a zinc finger gene in the developing nervous system. *Nature* **337**, 461-464.
- Wilkinson, D. G., Bhatt, S., Cook, M., Boncinelli, E. and Krumlauf, R. (1989b). Segmental expression of *Hox-2* homeobox containing genes in the developing mouse hindbrain. *Nature* **341**, 405-409.
- Wilson, S. W., Placzek, M. and Furley, A. J. (1993). Border disputes: do boundaries play a role in growth cone guidance? *TINS* **16**, 316-323.
- Wingate, R. J. T. and Lumsden, A. (1996). Persistence of rhombomeric organisation in the postsegmental hindbrain. *Development* **122**, 2143-2152.
- Wood, H., Gurman, P. and Morris-Kay, G. (1994). Exposure to retinoic acid before or after the onset of somitogenesis reveals separate effects on rhombomeric segmentation and 3' *HoxB* gene expression domains. *Development* **120**, 2279-2285.
- Xu, Q., Aلدus, G., Holder N. and Wilkinson, D. G. (1995). Expression of truncated *Sek-1* receptor tyrosine kinase disrupts the segmental restriction of gene expression in the *Xenopus* and zebrafish hindbrain. *Development* **121**, 4005-4016.

(Accepted 16 April 1997)
